# Supplementary material
Source: PubMed Central journal article supplement (PMC4142419)
Supplement: NIHMS594454-supplement-Data_supplement_as_requested.pdf [file NIHMS594454-supplement-Data_supplement_as_requested.pdf]

## Supplementary Online Content

Rome BN, Kramer DB, Kesselheim AS. FDA approval of cardiac implantable electronic devices via original and supplement premarket approval pathways, 1979-2012. *JAMA*. doi:10.1001/jama.2013.284986.

eTable 1. Origins of currently marketed ICD systems

eTable 2. Mean number of supplements approved per original PMA, by manufacturer

This supplementary material has been provided by the authors to give readers additional information about their work.

**eTable 1: Origins of currently marketed ICD systems**

| Manufacturer            | Device Model(s)                           | PMA Number (Supplement Number) | Supplement Type | Date Approved | Age of PMA at approval (years) |
|-------------------------|-------------------------------------------|--------------------------------|-----------------|---------------|--------------------------------|
| <b>Leads</b>            |                                           |                                |                 |               |                                |
| Biotronik               | Linix Smart                               | P980023 (S038)                 | 180-Day         | 9/17/2010     | 11.9                           |
| Boston Scientific       | Endotak Reliance G<br>0174/0175/0176/0177 | P910073 (S041)                 | 180-Day         | 11/4/2003     | 10.2                           |
| Boston Scientific       | Endotak Reliance G/SG<br>0180-0187        | P910073 (S043)                 | Real-Time       | 3/2/2004      | 10.5                           |
| Medtronic               | Sprint Quattro 6944                       | P920015 (S017)                 | 180-Day         | 12/15/2000    | 7.0                            |
| Medtronic               | Sprint Quattro 6947                       | P920015 (S024)                 | Real-Time       | 11/2/2001     | 7.9                            |
| Medtronic               | Sprint Quattro 6935                       | P920015 (S039)                 | Real-Time       | 4/29/2008     | 14.4                           |
| Medtronic               | Sprint Quarto 6947M                       | P920015 (S055)                 | 180-Day         | 1/9/2012      | 18.1                           |
| Medtronic               | Sprint Quattro 6935M                      | P920015 (S091)                 | Real-Time       | 7/2/2012      | 18.6                           |
| St. Jude Medical        | Durata 7120/7121/7122                     | P950022 (S040)                 | Real-Time       | 9/6/2007      | 11.3                           |
| St. Jude Medical        | Durata 7170/7171                          | P950022 (S041)                 | Real-Time       | 10/16/2007    | 11.4                           |
| St. Jude Medical        | Durata<br>7120Q/7121Q/7122Q               | P950022 (S042)                 | 180-Day         | 1/13/2009     | 12.7                           |
| St. Jude Medical        | Durata 7170Q/7171Q                        | P950022 (S060)                 | Real-Time       | 7/10/2009     | 13.2                           |
| <b>Pulse Generators</b> |                                           |                                |                 |               |                                |
| Biotronik               | Lumax 300/340                             | P000009 (S020)                 | 180-Day         | 12/7/2006     | 6.2                            |
| Biotronik               | Lumax 540                                 | P000009 (S026)                 | 180-Day         | 11/4/2008     | 8.1                            |
| Biotronik               | Lumax 700/740                             | P000009 (S047)                 | 180-Day         | 5/4/2012      | 11.6                           |
| Biotronik               | Lumax 540 VR-T DX                         | P050023 (S029)                 | Real-Time       | 4/30/2010     | 3.7                            |
| Biotronik               | Lumax 740 VR-T DX                         | P050023 (S048)                 | 180-Day         | 5/4/2012      | 5.7                            |
| Boston Scientific       | Teligen E102/E110                         | P960040 (S155)                 | 180-Day         | 5/8/2008      | 10.8                           |
| Boston Scientific       | Energen, Incepta,<br>Punctua              | P960040 (S235)                 | 180-Day         | 11/17/2011    | 14.3                           |
| Medtronic               | Secura                                    | P980016 (S114)                 | 180-Day         | 3/17/2008     | 9.4                            |
| Medtronic               | Protecta, Protecta XT                     | P980016 (S211)                 | 180-Day         | 3/25/2011     | 12.5                           |
| Sorin Group             | Paradym 8250/8550                         | P980049 (S050)                 | 180-Day         | 4/7/2010      | 10.6                           |
| Sorin Group             | Paradym RF 9250/9550                      | P980049 (S065)                 | 180-Day         | 4/10/2012     | 12.6                           |
| St. Jude                | Current+ CD1211-36Q                       | P910023 (S201)                 | Real-Time       | 4/8/2009      | 15.9                           |
| St. Jude                | Fortify                                   | P910023 (S226)                 | 180-Day         | 5/7/2010      | 17.0                           |
| St. Jude                | Ellipse, Fortify Assura                   | P910023 (S279)                 | 180-Day         | 5/7/2012      | 19.0                           |

ICD = Implantable Cardioverter-Defibrillator; PMA = Pre-Market Approval

**eTable 2: Mean number of supplements approved per original PMA, by manufacturer**

| <b>Manufacturer*</b>     | <b>Number of Original PMAs Approved</b> | <b>Mean number of approved supplements per original PMA (standard deviation)</b> | <b>Mean number of approved supplements per original PMA, excluding 30-day notice supplements (standard deviation)</b> |
|--------------------------|-----------------------------------------|----------------------------------------------------------------------------------|-----------------------------------------------------------------------------------------------------------------------|
| Medtronic                | 22                                      | 114 (99)                                                                         | 49 (45)                                                                                                               |
| Boston Scientific        | 18                                      | 70 (80)                                                                          | 36 (32)                                                                                                               |
| St. Jude Medical         | 12                                      | 104 (89)                                                                         | 71 (53)                                                                                                               |
| Biotronik                | 6                                       | 51 (28)                                                                          | 42 (23)                                                                                                               |
| Sorin                    | 5                                       | 40 (31)                                                                          | 22 (18)                                                                                                               |
| Pacesetter               | 4                                       | 27 (32)                                                                          | 13 (14)                                                                                                               |
| Teleelectronics          | 3                                       | 12 (16)                                                                          | 11 (16)                                                                                                               |
| Guidant                  | 2                                       | 50 (46)                                                                          | 9 (8)                                                                                                                 |
| Cardiac Control Systems  | 2                                       | 14 (3)                                                                           | 14 (3)                                                                                                                |
| Cameron Health           | 1                                       | 1                                                                                | 0                                                                                                                     |
| Angeion                  | 1                                       | 4                                                                                | 4                                                                                                                     |
| Cook Pacemaker           | 1                                       | 10                                                                               | 10                                                                                                                    |
| <b>All Manufacturers</b> | <b>77</b>                               | <b>76 (82)</b>                                                                   | <b>40 (40)</b>                                                                                                        |

\*Each PMA is assigned to the manufacturer that submitted its most recent supplement. Many PMAs changed ownership over time as manufacturers merged (*e.g.*, Boston Scientific acquired Guidant), so the supplements for a given original PMA may have actually been submitted by several different manufacturers.
